# Supplementary material
Source: MDPI journal article supplement (https://www.mdpi.com/2073-445X/11/10/1833)
Supplement: s1 [file s1]

**Supplementary Table S1.** Weather data of the experimental site

| Period                | Tmax (°C)   | Tmin (°C)   | RH (%)      | Rainfall<br>(mm) | Wind speed<br>(km/hr) | Solar radiation<br>(Mj/m <sup>2</sup> /day) | ETP (mm)      |
|-----------------------|-------------|-------------|-------------|------------------|-----------------------|---------------------------------------------|---------------|
| November 2017         | 15.2        | 31.9        | 69.2        | 21.7             | 6.8                   | 22.1                                        | 17.0          |
| December 2017         | 20.0        | 32.6        | 72.6        | 32.1             | 6.1                   | 23.3                                        | 73.5          |
| January 2018          | 19.3        | 30.4        | 73.5        | 44.5             | 5.8                   | 32.2                                        | 91.3          |
| February 2018         | 19.4        | 31.8        | 73.1        | 54.9             | 6.9                   | 32.3                                        | 121.1         |
| March 2018a           | 19.3        | 31.4        | 73.5        | 51.5             | 7.1                   | 32.2                                        | 56.5          |
| <b>Total season 1</b> | <b>18.6</b> | <b>31.6</b> | <b>72.4</b> | <b>204.7</b>     | <b>6.6</b>            | <b>28.4</b>                                 | <b>359.4</b>  |
| March 2018b           | 19.3        | 31.3        | 78.8        | 37.2             | 6.4                   | 32.5                                        | 34.0          |
| April 2018            | 19.4        | 30.5        | 78.2        | 147.6            | 5.8                   | 32.9                                        | 85.8          |
| May 2018              | 19.2        | 30.9        | 62.0        | 103.6            | 8.8                   | 31.9                                        | 218.1         |
| June 2018             | 18.6        | 31.5        | 64.3        | 1.1              | 8.3                   | 29.4                                        | 184.2         |
| <b>Total season 2</b> | <b>19.1</b> | <b>31.1</b> | <b>70.8</b> | <b>289.5</b>     | <b>7.3</b>            | <b>31.7</b>                                 | <b>522.1</b>  |
| November 2018         | 15.4        | 30.8        | 75.0        | 42.5             | 6.9                   | 32.3                                        | 32.1          |
| December 2018         | 15.3        | 31.4        | 73.9        | 43.8             | 6.0                   | 32.3                                        | 83.6          |
| January 2019          | 15.7        | 32.1        | 73.8        | 21.4             | 6.1                   | 32.1                                        | 114.6         |
| February 2019         | 16.9        | 32.2        | 75.1        | 12.9             | 6.5                   | 31.9                                        | 66.0          |
| March 2019            | 15.2        | 31.9        | 72.4        | 21.8             | 6.4                   | 32.0                                        | 51.4          |
| <b>Total season 3</b> | <b>15.7</b> | <b>31.7</b> | <b>74.0</b> | <b>142.4</b>     | <b>6.4</b>            | <b>32.1</b>                                 | <b>347.7</b>  |
| <b>Mean/Sum</b>       | <b>17.8</b> | <b>31.5</b> | <b>72.4</b> | <b>636.6</b>     | <b>6.8</b>            | <b>30.7</b>                                 | <b>1229.2</b> |

Legend: Tmax (Maximum temperature), Tmin (Minimum temperature), RH (Relative Humidity), ETP (Evapotranspiration)

**Supplementary Table S2:** Statistical analysis of soil characteristics of the experiment site in Ruzizi plain, eastern DR Congo

|                                        | Probability<br>SWC | Probability<br>Slope | SED Slope | Probability<br>Depth | SED Slope |
|----------------------------------------|--------------------|----------------------|-----------|----------------------|-----------|
| Clay (%)                               | 0.22               | 0.1197               | 4.10      | 0.0066               | 3.61      |
| Silt (%)                               | 0.171              | 0.0258               | 6.27      | 0.00163              | 5.54      |
| Field Capacity (FC)                    | 0.3613             | 0.18                 | 2.23      | 0.0303               | 2.54      |
| Sand (%)                               | 0.3615             | 0.1832               | 4.047     | 0.0303               | 3.72      |
| Carbon (%)                             | 0.525              | 0.0046               | 1.06      | 0.015                | 1.12      |
| Coarse Fraction (%)                    | 0.199              | 0.0068               | 8.54      | 0.191                | 11.00     |
| Permanent wilt point (PWP)             | 0.293              | 0.0006               | 1.85      | 0.61                 | 2.27      |
| Bulk density (BD)                      | 0.371              | 0.58                 | 0.09      | 0.0155               | 0.07      |
| Nitrogen (%)                           | 0.762              | 0.006                | 0.091     | 0.074                | 0.10      |
| Phosphorus (ppm)                       | 0.261              | 0.469                | 30.76     | 0.59                 | 31.08     |
| pH water                               | 0.73               | 0.00001              | 0.19      | 0.034                | 0.310     |
| Saturated Hydraulic Conductivity (SHC) | 0.62329            | 0.97508              | 19.65     | 0.008                | 15.61     |

SED: Standard Error of Difference, SWC: Soil water conservation practices

**Supplementary Table S3.** Effects of SWC, variety and slope gradient on maize growth parameters across three growing seasons in the Ruzizi plain, eastern DR Congo

| Factor              | Level                     | Plant height<br>(cm) | Stem diameter<br>(mm) | Internode<br>distance (cm) | LAI         | SBM (t ha <sup>-1</sup> ) | RBM (t ha <sup>-1</sup> ) | RSR         |
|---------------------|---------------------------|----------------------|-----------------------|----------------------------|-------------|---------------------------|---------------------------|-------------|
| <b>Slope</b>        | 0-2                       | 210.03 ±53.37a       | 6.86 ±9.03b           | 15.37 ±3.03a               | 2.63 ±0.47a | 6.36 ±2.02a               | 2.66 ±1.26a               | 0.42 ±0.17a |
|                     | 2-8                       | 167.64 ±50.12b       | 10.52 ±10.36a         | 12.61 ±3.75b               | 1.40 ±0.45b | 5.82 ±2.57b               | 2.61 ±1.31a               | 0.43 ±0.19a |
|                     | 8-15                      | 161.18 ±79.69c       | 8.77 ±10.30a          | 12.44 ±5.27b               | 1.11 ±0.55c | 4.79 ±2.28c               | 1.97 ±1.06b               | 0.37 ±0.19b |
|                     | P-value (0.05 LSD)        | <0.01                | <0.01                 | <0.01                      | <0.01       | <0.01                     | <0.01                     | <0.01       |
| <b>SWC</b>          | Conv.Tillage              | 169.67 ±79.77b       | 6.92 ±8.86c           | 12.52 ±5.48b               | 1.62 ±0.97c | 4.72 ±2.16a               | 2.00 ±1.15a               | 0.37 ±0.19a |
|                     | Tied ridge                | 196.04 ±49.51a       | 8.89 ±9.80b           | 14.36 ±3.01a               | 2.07 ±0.68a | 6.71 ±2.03b               | 2.89 ±1.29b               | 0.43 ±0.17b |
|                     | Zai pits                  | 184.20 ±50.17a       | 10.30 ±10.86a         | 14.17 ±3.01a               | 1.81 ±0.72b | 6.07 ±2.46b               | 2.61 ±1.21b               | 0.44 ±0.18b |
|                     | P-value (0.05 LSD)        | <0.01                | <0.01                 | <0.01                      | <0.01       | <0.01                     | <0.01                     | <0.01       |
| <b>Varieties</b>    | Bazoka                    | 179.01 ±61.44a       | 9.73 ±10.31a          | 13.57 ±3.87a               | 1.73 ±0.75a | 6.02 ±2.50a               | 2.46 ±1.15a               | 0.41 ±0.18a |
|                     | Ecavel                    | 189.73 ±62.73a       | 7.18 ±9.12b           | 13.85 ±4.37a               | 1.99 ±0.88a | 5.55 ±2.11b               | 2.57 ±1.42a               | 0.42 ±0.19a |
|                     | P-value (0.05 LSD)        | >0.05                | <0.01                 | >0.05                      | >0.05       | <0.01                     | >0.05                     | >0.05       |
| <b>Interactions</b> | P SWC x Slope             | <0.05                | <0.01                 | <0.01                      | <0.01       | <0.05                     | >0.05                     | <0.05       |
|                     | P SWC x Varieties         | >0.05                |                       | <0.05                      | >0.05       | >0.05                     | >0.05                     | >0.05       |
|                     | P Slope x Varieties x SWC | >0.05                | <0.01                 | <0.01                      | <0.05       | >0.05                     | >0.05                     | >0.05       |

Legend: LAI (Leaf Area Index), SBM (Shoot Biomass), RBM (Root Biomass) and SWC (Soil water conservation).

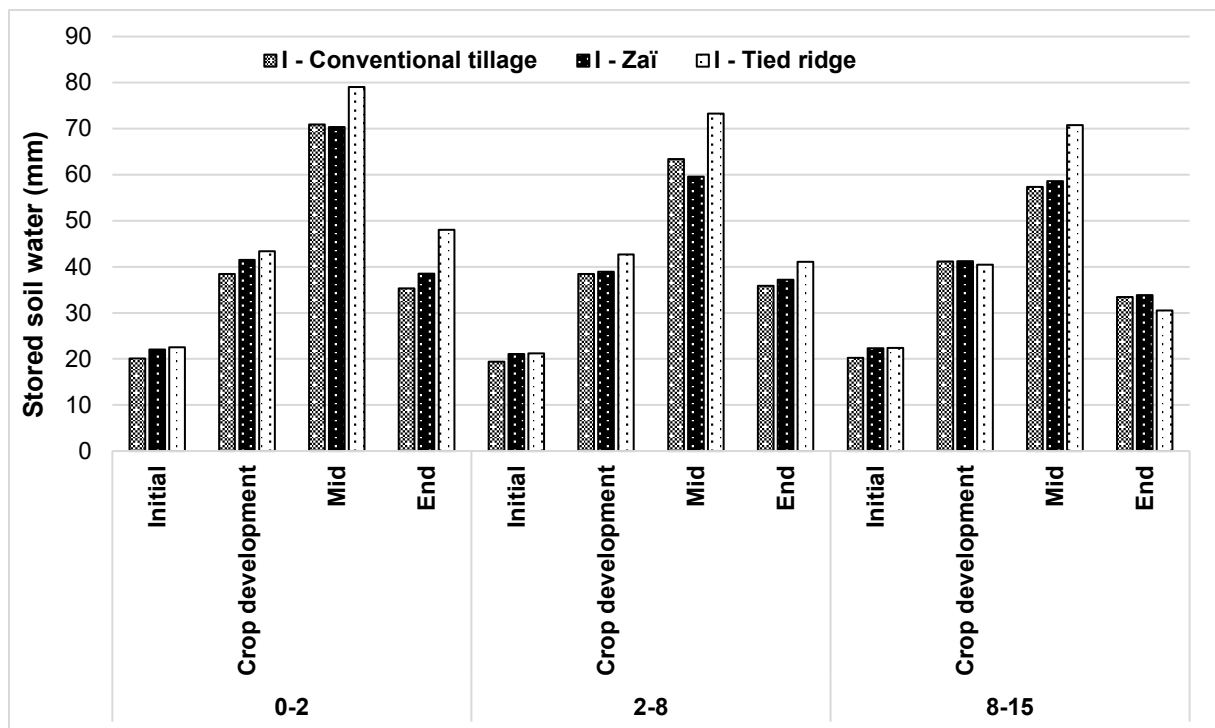

**Supplementary Figure S1.** Variation in soil water storage among selected SWC practices along the slope gradient in Ruzizi plain for season 1.

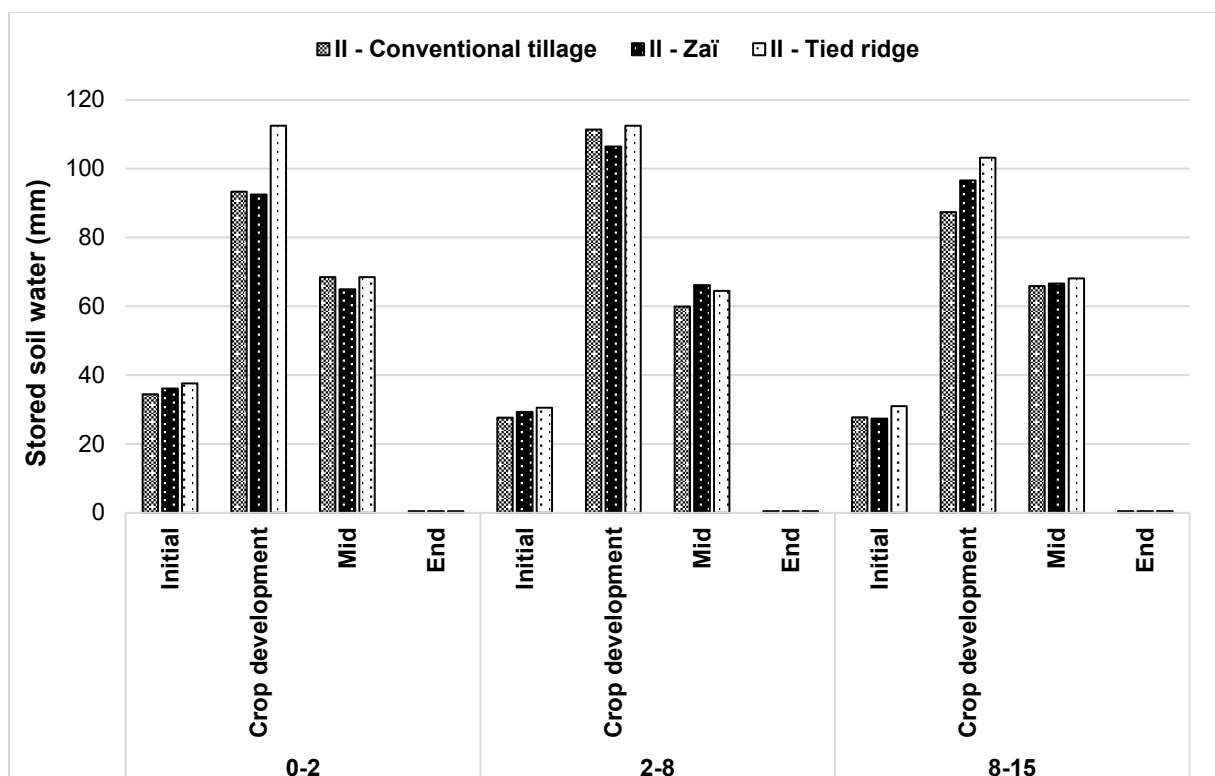

**Supplementary Figure S2.** Variation in stored soil water among selected SWC practices along the slope gradient in Ruzizi plain for season 2.

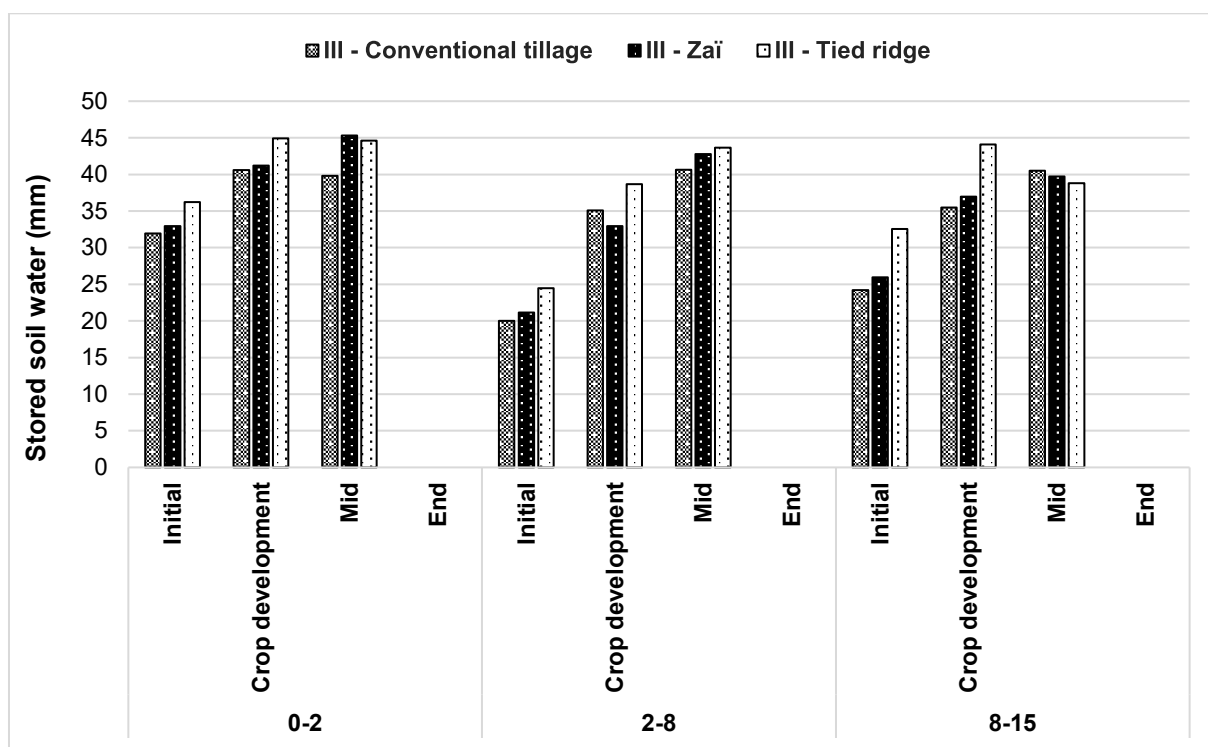

**Supplementary Figure S3.** Variation in stored soil water among selected SWC practices along the slope gradient in Ruzizi plain for season 3.
